# Supplementary material for: Novel thermo-responsive hydrogel microspheres with calixcrown host molecules as cross-links for highly specific binding and controllable release of cesium
Source: Royal Society of Chemistry journal article supplement (doi:10.1039/c5ra07349a), 2015-01-01
Supplement: c5ra07349a1.pdf [file c5ra07349a1.pdf]

● **Supporting information of**

Novel Thermo-responsive Hydrogel Microsphere with Calixcrown Host  
Molecules as Cross-links for Highly-specific Binding and Controllable  
Release of Cesium

*Rong Yi, Gang Ye, Dachao Lv, Jing Chen*

**Contents**

Experimental (Page 2)

Fig. S1 <sup>1</sup>H NMR spectrum of acryl-calix[4]-crown-6 (Page 3)

Fig. S2 <sup>13</sup>C NMR spectrum of acryl-calix[4]-crown-6 (Page 4)

Fig. S3 Large-scaled AFM images of PNIPAM-*cl*-calixcrown microspheres (Page 5)

Table S1 Elemental analysis of the pristine and calixcrown cross-linked PNIPAM  
hydrogel microspheres (Page 6)

References (Page 7)

## Experimental

**Chemicals.** *N*-isopropylacrylamide (NIPAM) (> 98%) and *N,N'*-methylenebisacrylamide (MBA) (99%) were purchased from Alfa Aesar, 2,2'-azobisisobutyronitrile (AIBN) (98%) was obtained from Sigma-Aldrich and recrystallized before use as initiator. 1,3-di(2-propoxy)calix[4]arene-crown-6 (**0**) were synthesized and purified according to a previous report.<sup>1</sup> Tetrahydrofuran (THF) was freshly distilled over sodium prior to use. Other chemicals and solvents were of analytical grade and used as received without further purification.

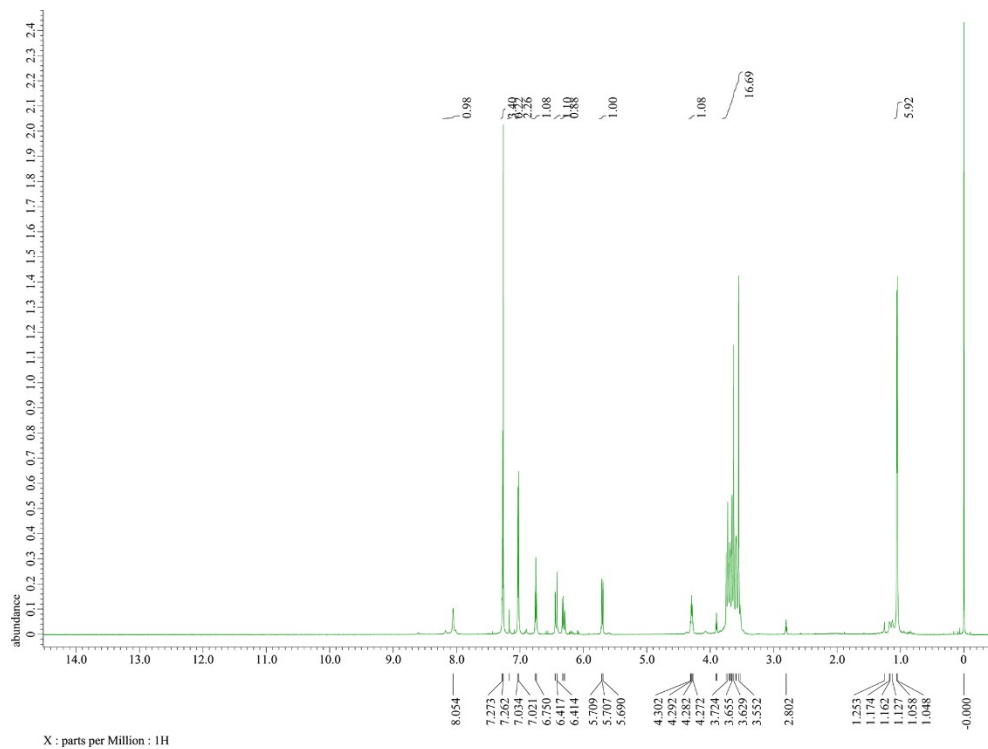

**Fig. S1**  $^1\text{H}$  NMR of spectrum of acryl-calix[4]-crown-6

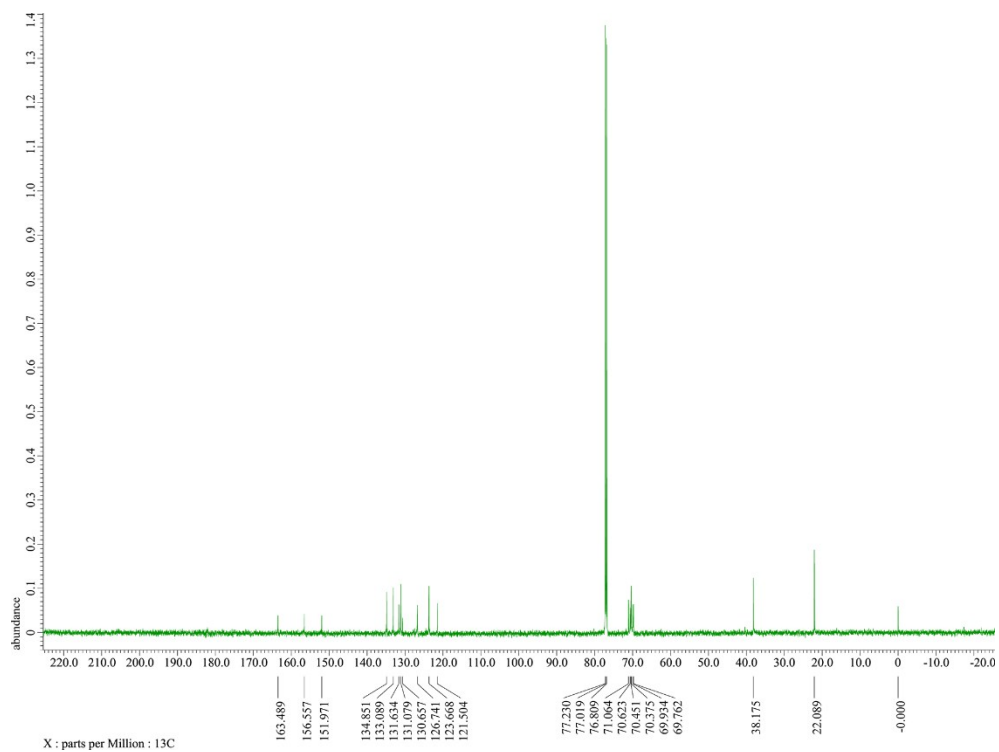

**Fig. S2**  $^{13}\text{C}$  NMR spectrum of acryl-calix[4]-crown-6.

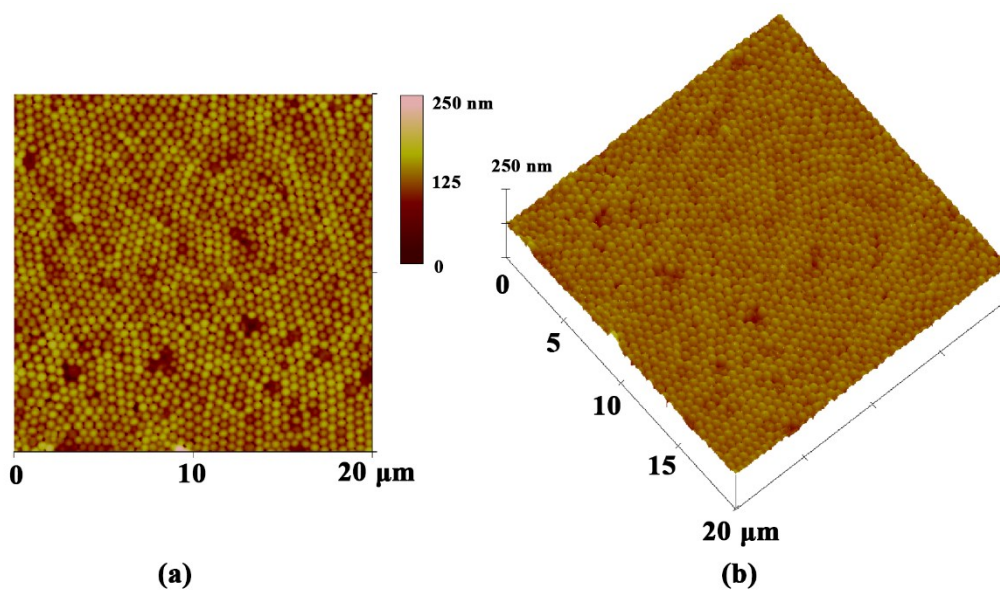

**Fig. S3** Large-scaled AFM images of PNIPAM-*cl*-calixcrown microspheres.

**Table S1** Elemental analysis of the pristine and calixcrown cross-linked PNIPAM hydrogel microspheres.

| <b>Samples</b>                | <b><i>C (wt.%)</i></b> | <b><i>H (wt.%)</i></b> | <b><i>N (wt.%)</i></b> |
|-------------------------------|------------------------|------------------------|------------------------|
| PNIPAM                        | 63.79                  | 10.01                  | 12.17                  |
| PNIPAM- <i>cl</i> -calixcrown | 64.46                  | 9.82                   | 11.38                  |

## REFERENCES

- (1) Casnati, A.; Pochini, A.; Ungaro, R.; Ugozzoli, F.; Arnaud, F.; Fanni, S.; Schwing, M.; Egberink, R. J. M.; de Jong, F.; Reinhoudt, D. N. Synthesis, Complexation, and Membrane Transport Studies of 1,3-Alternate Calix[4]Arene-Crown-6 Conformers. *Journal of American Chemical Society*. **1995**, *117*, 2767-2777.
